# Supplementary material
Source: publisher site journal article supplement (https://www.spandidos-publications.com/3034/downloadSupplementary)

Figure S1. Detailed body weight comparisons of male and female animals from 1 to 11 months of age. There was a significantly higher growth rate in male guinea pigs compare with the female guinea pigs. n=6 per group.

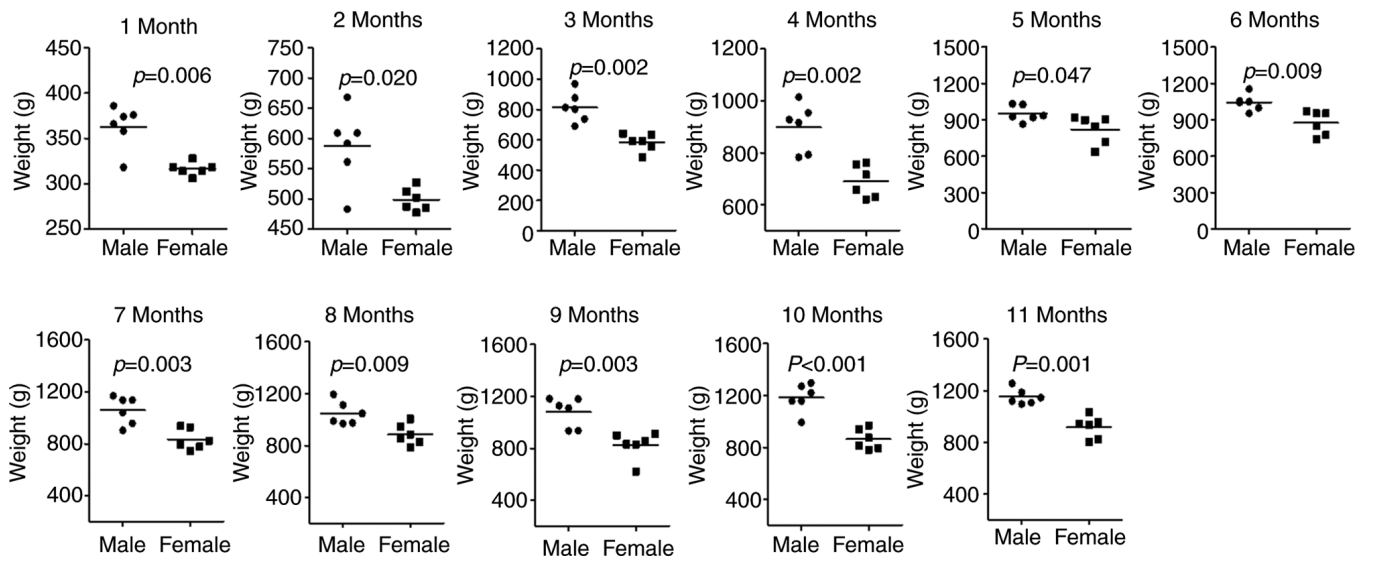

Figure S2. Heat maps of identified proteins with definite identities detected in the subchondral bone of (A) male and (B) female Hartley guinea pigs. Amongst these, half of the proteins were upregulated (69/138) and the other half (69/138) were downregulated in the male animals, whereas 60 out of 113 proteins were upregulated and 53 proteins were downregulated in the female animals. 1MM, 1-month-old male guinea pig; 1MF, 1-month-old female guinea pig; 3MM, 3-month-old male guinea pig; 3MF, 3-month-old female guinea pig.

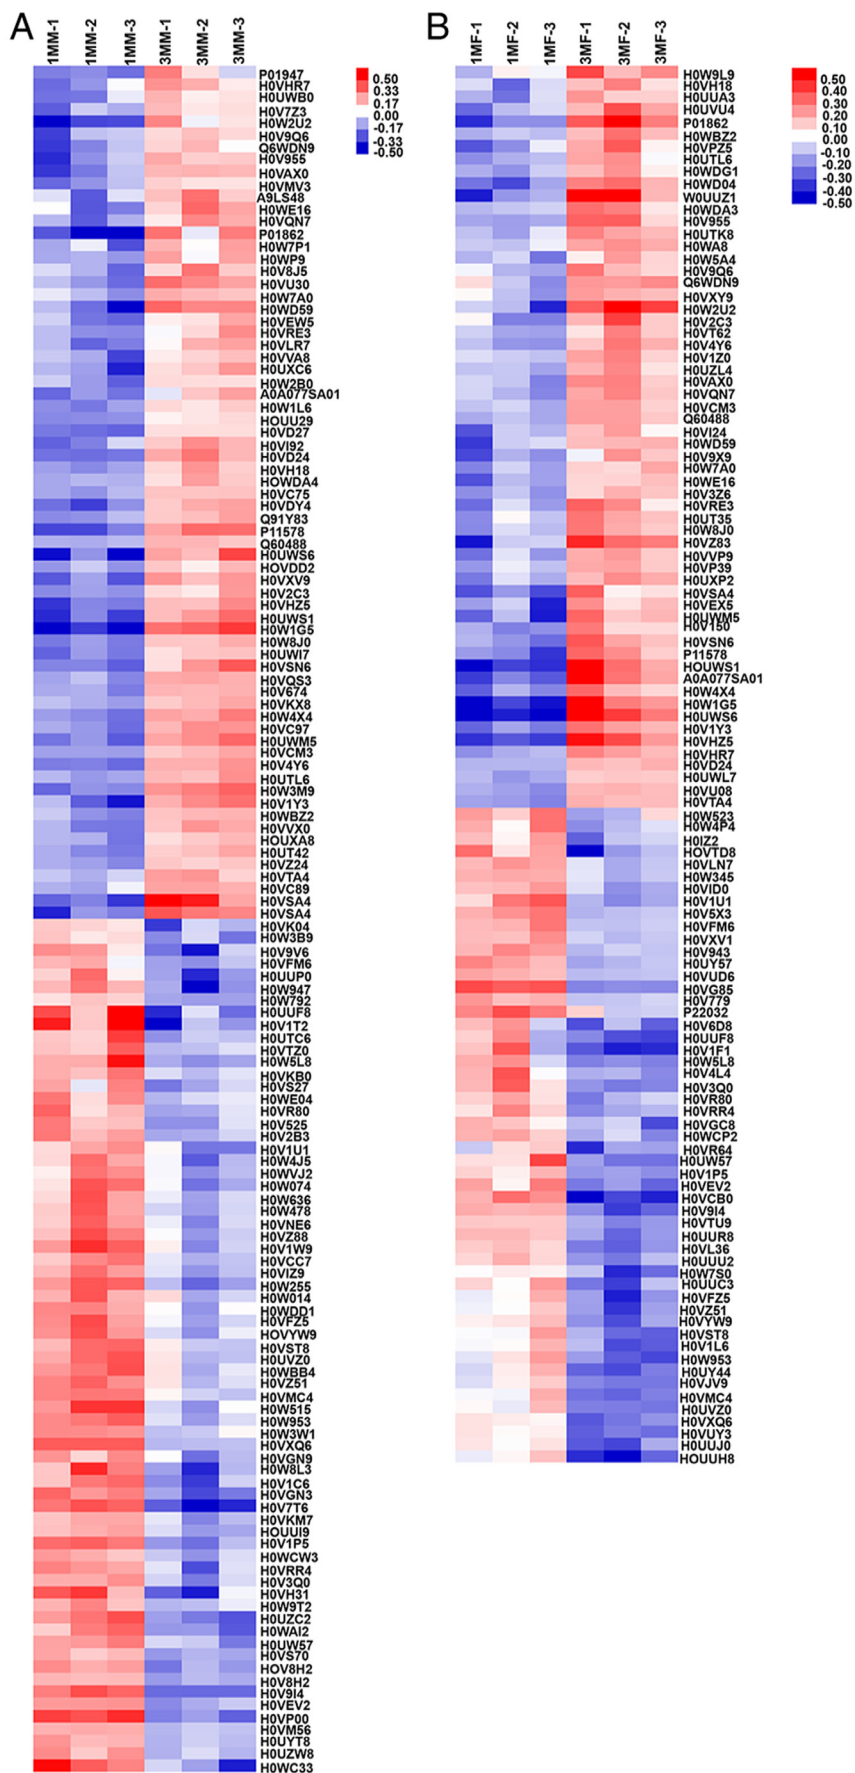

Supplement: Supplementary file 1 [file downloadSupplementary]
